# Supplementary material
Source: PubMed Central journal article supplement (PMC5497811)
Supplement: NIHMS73055-supplement-Supplementary_Information.pdf [file NIHMS73055-supplement-Supplementary_Information.pdf]

**Supplementary Table 1 | Data collection and refinement statistics for BT2261-2264**

|                                                             | BT2261-64<br>Native 1       | BT2261-64<br>Native 2                         | BT2261-64<br>SeMet           |
|-------------------------------------------------------------|-----------------------------|-----------------------------------------------|------------------------------|
| <b>Data Collection</b>                                      |                             |                                               |                              |
| Space group                                                 | P1                          | P2 <sub>1</sub> 2 <sub>1</sub> 2 <sub>1</sub> | P2 <sub>1</sub>              |
| Cell dimensions (a,b,c)<br>angles ( $\alpha,\beta,\gamma$ ) | 92, 123, 123<br>111, 98, 99 | 124, 180, 246<br>90, 90, 90                   | 222, 92, 261<br>90, 98.2, 90 |
| Molecules/AU                                                | 2 tetramers                 | 2 tetramers                                   | 4 tetramers                  |
| Resolution (Å)                                              | 67-2.75                     | 49-3.4                                        | 49-2.8                       |
| I/ $\sigma$ I                                               | 5.8 (1.7) <sup>#</sup>      | 10.3 (2.0)                                    | 8.9 (2.1)                    |
| Completeness                                                | 100 (100)                   | 100 (100)                                     | 99.6 (99.1)                  |
| Redundancy                                                  | 3.8 (3.6)                   | 7.6 (7.6)                                     | 9.3 (9.2)                    |
| Rpim (%)                                                    | 12.6 (46)                   | 6.9 (43)                                      | 7.5 (48)                     |
| CC (1/2)                                                    | 0.96 (0.54)                 | 1.00 (0.68)                                   | 1.00 (0.90)                  |
| <b>Refinement</b>                                           |                             |                                               |                              |
| Resolution (Å)                                              | 53-2.75                     | 48-3.4                                        | 49-2.8                       |
| No. reflections                                             | 125658                      | 76084                                         | 255319                       |
| R <sub>work</sub> /R <sub>free</sub> (%)                    | 21.0/25.9                   | 20.0/25.5                                     | 19.8/25.5                    |
| No. atoms                                                   |                             |                                               |                              |
| protein/water/<br>ligand/detergent                          | 26165/932<br>78/35          | 25810/-<br>82/-                               | 49114/-<br>164/-             |
| B factors (Å <sup>2</sup> )                                 |                             |                                               |                              |
| protein/water<br>ligand/detergent                           | 42/21<br>41/31              | 89/-<br>75/-                                  | 68/-<br>65/-                 |
| R.m.s deviations                                            |                             |                                               |                              |
| bond lengths (Å)                                            | 0.014                       | 0.013                                         | 0.008                        |
| bond angles (°)                                             | 0.95                        | 1.18                                          | 1.07                         |
| Molprobtity clashscore                                      | 10.2                        | 13.3                                          | 12.3                         |

<sup>#</sup> Values in parentheses are for the highest resolution shell

---

**Supplementary Table 2 | Data collection and refinement statistics for soluble proteins**

---

|                                                             | BT2263                       | BT2262                           | BT1762                     |
|-------------------------------------------------------------|------------------------------|----------------------------------|----------------------------|
| <b>Data Collection</b>                                      |                              |                                  |                            |
| Space group                                                 | P2 <sub>1</sub>              | P4 <sub>1</sub> 2 <sub>1</sub> 2 | C222 <sub>1</sub>          |
| Cell dimensions (a,b,c)<br>angles ( $\alpha,\beta,\gamma$ ) | 55, 80, 121<br>90, 100.2, 90 | 167, 167, 100<br>90, 90, 90      | 108, 129, 87<br>90, 90, 90 |
| Molecules/AU                                                | 2                            | 4                                | 1                          |
| Resolution (Å)                                              | 46-1.83                      | 49-3.1                           | 45.7-1.76                  |
| I/ $\sigma$ I                                               | 9.7 (1.5)                    | 15.3 (2.5)                       | 11.2 (1.9)                 |
| Completeness                                                | 99.3 (100)                   | 100 (100)                        | 98.9 (94.6)                |
| Redundancy                                                  | 3.6 (3.6)                    | 14.7 (14.8)                      | 4 (3.6)                    |
| Rpim (%)                                                    | 5.8 (55)                     | 5.1 (46)                         | 5.4 (37.4)                 |
| CC (1/2)                                                    | 0.99 (0.58)                  | 0.99 (0.78)                      | 0.99 (0.59)                |
| <b>Refinement</b>                                           |                              |                                  |                            |
| Resolution (Å)                                              | 47.5-1.9                     | 48.7-3.1                         | 45.7-1.76                  |
| No. reflections                                             | 80356                        | 26387                            | 59338                      |
| R <sub>work</sub> /R <sub>free</sub> (%)                    | 15.8/19.9                    | 19.9/26.0                        | 15.6/18.8                  |
| No. atoms                                                   |                              |                                  |                            |
| protein/water/<br>ligand/detergent                          | 7190/876<br>-/-              | 6180/-<br>-/-                    | 4325/331<br>-/-            |
| B factors (Å <sup>2</sup> )                                 |                              |                                  |                            |
| protein/water<br>ligand/detergent                           | 30/38<br>-/-                 | 86/-<br>-/-                      | 17/21<br>-/-               |
| R.m.s deviations                                            |                              |                                  |                            |
| bond lengths (Å)                                            | 0.007                        | 0.010                            | 0.015                      |
| bond angles (°)                                             | 0.80                         | 1.37                             | 1.57                       |
| Molprobit clashscore                                        | 2.6                          | 16.2                             | 0.83                       |

---

**Supplementary Table 3 | Data collection and refinement statistics for BT1762-63**

|                                                             | BT1762-63<br>(Native 1)          | BT1762-63<br>(Native 2)                       |
|-------------------------------------------------------------|----------------------------------|-----------------------------------------------|
| <b>Data Collection</b>                                      |                                  |                                               |
| Space group                                                 | P2 <sub>1</sub> 2 <sub>1</sub> 2 | P2 <sub>1</sub> 2 <sub>1</sub> 2 <sub>1</sub> |
| Cell dimensions (a,b,c)<br>angles ( $\alpha,\beta,\gamma$ ) | 152, 117, 120<br>90, 90, 90      | 111, 152, 253<br>90, 90, 90                   |
| Molecules/AU                                                | 1                                | 2                                             |
| Resolution (Å)                                              | 84-3.10                          | 152-3.10                                      |
| I/ $\sigma$ I                                               | 4.8 (1.6)                        | 10.7 (1.5)                                    |
| Completeness                                                | 100.0 (100.0)                    | 100.0 (100.0)                                 |
| Redundancy                                                  | 7.2 (7.0)                        | 5.7 (5.7)                                     |
| Rpim (%)                                                    | 14.2 (63.4)                      | 4.6 (53.0)                                    |
| CC (1/2)                                                    | 0.97 (0.72)                      | 0.98 (0.70)                                   |
| <b>Refinement</b>                                           |                                  |                                               |
| Resolution (Å)                                              | 76-3.10                          | 130-3.10                                      |
| No. reflections                                             | 39461                            | 77436                                         |
| R <sub>work</sub> /R <sub>free</sub> (%)                    | 19.7/25.9                        | 19.8/26.9                                     |
| No. atoms                                                   |                                  |                                               |
| protein/water/<br>ligand/detergent                          | 10857/-<br>3/-                   | 21722/-<br>5/-                                |
| B factors (Å <sup>2</sup> )                                 |                                  |                                               |
| protein/water<br>ligand/detergent                           | 75/-<br>57/-                     | 72/-<br>56/-                                  |
| R.m.s deviations                                            |                                  |                                               |
| bond lengths (Å)<br>bond angles (°)                         | 0.010<br>1.27                    | 0.010<br>1.25                                 |
| Molprobrity clashscore                                      | 13.6                             | 13.0                                          |
